# Supplementary material for: Convergence of dissolving and melting at the nanoscale
Source: Royal Society of Chemistry journal article supplement (doi:10.1039/d3fd00095h), 2023-08-08
Supplement: d3fd00095h1.pdf [file d3fd00095h1.pdf]

## 1 Supplementary Information

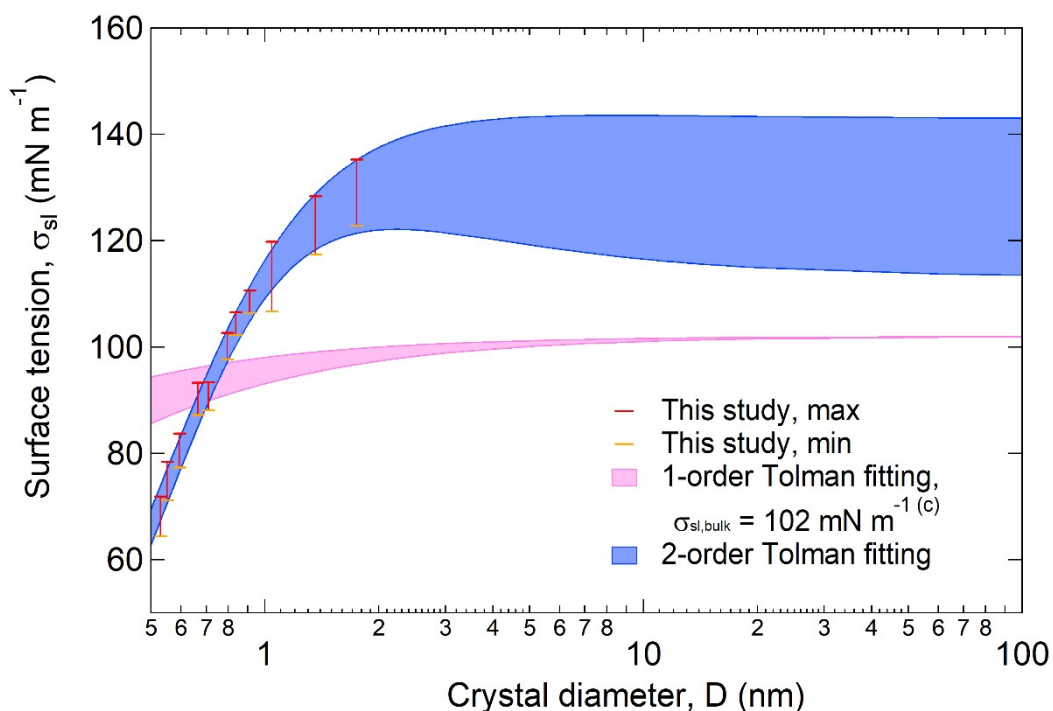

2

3 **Figure S1. Size-dependent solid-liquid surface tension of NaCl nanoparticles at 300 K.** The  
4 solid-liquid surface tension of NaCl nanoparticles is obtained from the MD simulated solubility  
5 data sets by the combination of the Ostwald-Freundlich equation with the Gibbs-Duhem equation  
6 (red and orange bars). The blue shaded curves are derived from the 2<sup>nd</sup> Tolman equation. (c)The  
7 light pink shaded curves are derived from the 1<sup>st</sup> order Tolman equation with the bulk solid-liquid  
8 surface tension from Bahadur and Russell<sup>17</sup>.

9

10

11

12

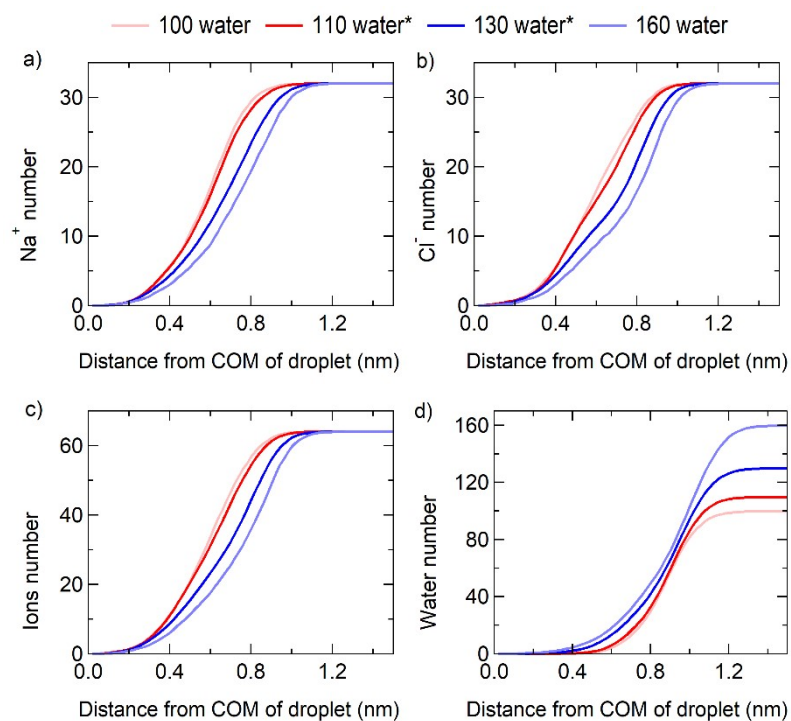

13

14 **Figure S2. Cumulative number profiles of ions and water molecules in the particles**  
 15 **composed of 1 nm NaCl (32 pairs) and different numbers of water molecules.** (a) for Na<sup>+</sup> ions,  
 16 (b) for Cl<sup>-</sup> ions, (c) for ions, and (d) for water molecules. Particles with less than 110 water  
 17 molecules are in the incompletely dissolved state (light red lines). Particles with 110-130 water  
 18 molecules are in the critically dissolved state (red and blue lines). And particles with more than  
 19 130 water molecules are saturated NaCl aqueous nanodroplets (light blue lines).

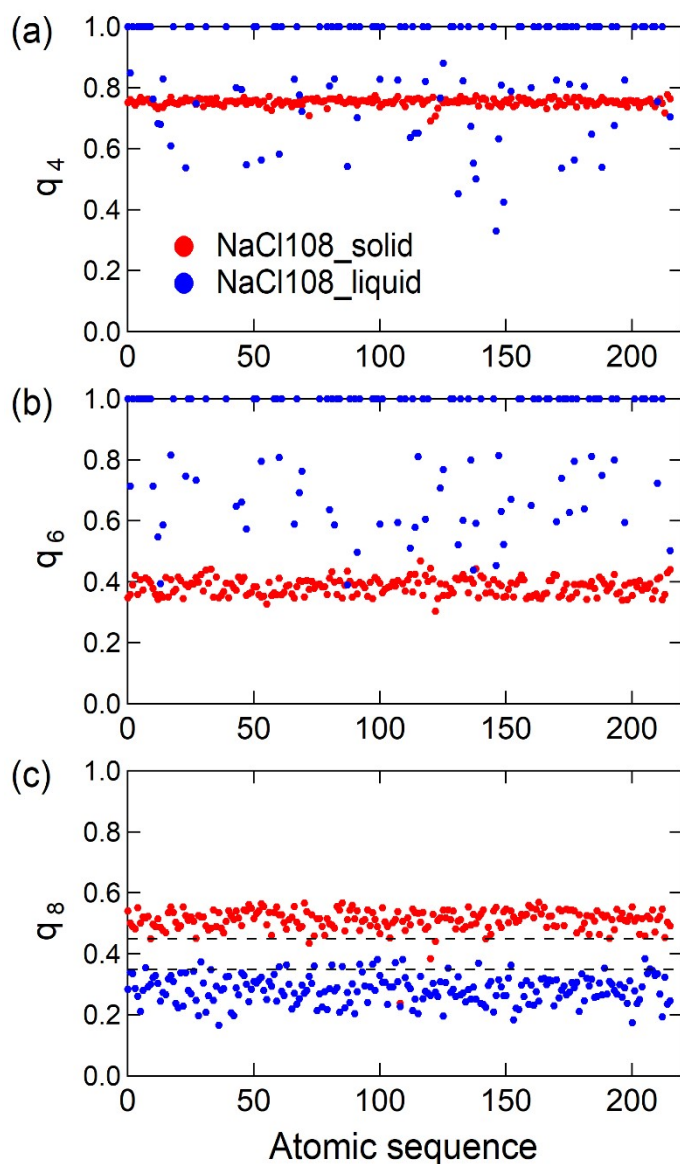

20

21 **Figure S3.  $q_4$ ,  $q_6$ ,  $q_8$  atomic distributions for the cubic nanocrystal with 108 pairs of NaCl in**  
 22 **the solid phase and a dissolved state as representative of the liquid phase at 300 K. This figure**  
 23 **indicates that  $q_8$  provides the best separation between liquid and solid phase distributions compared**  
 24 **to  $q_4$  and  $q_6$ . The vertical dash line in (c) indicates the selected threshold ( $q_8 = 0.35$ ).**

25

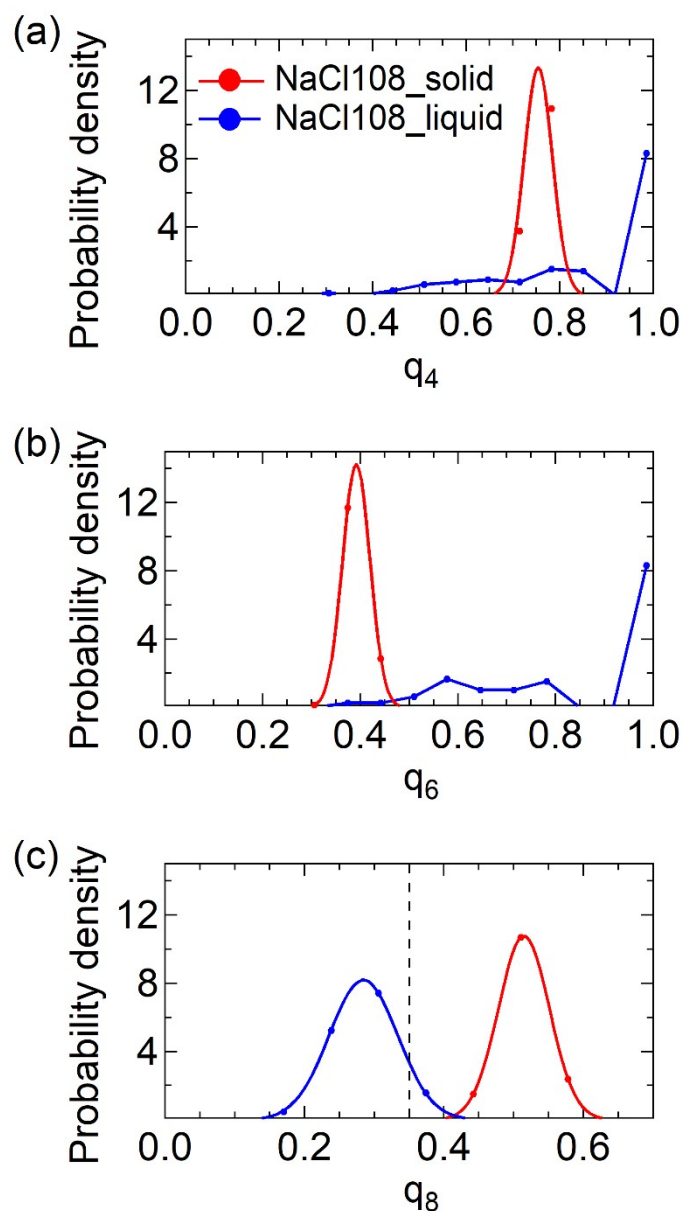

26

27 **Figure S4.  $q_4$ ,  $q_6$ ,  $q_8$  probability density distributions for the cubic nanocrystal with 108 pairs**  
 28 **of NaCl in the solid phase and a dissolved state as representative of the liquid phase at 300**  
 29 **K. This figure indicates that  $q_8$  provides the best separation between liquid and solid phase**  
 30 **distributions compared to  $q_4$  and  $q_6$ . The vertical dash line in (c) indicates the selected threshold**  
 31 **( $q_8 = 0.35$ ).**

32

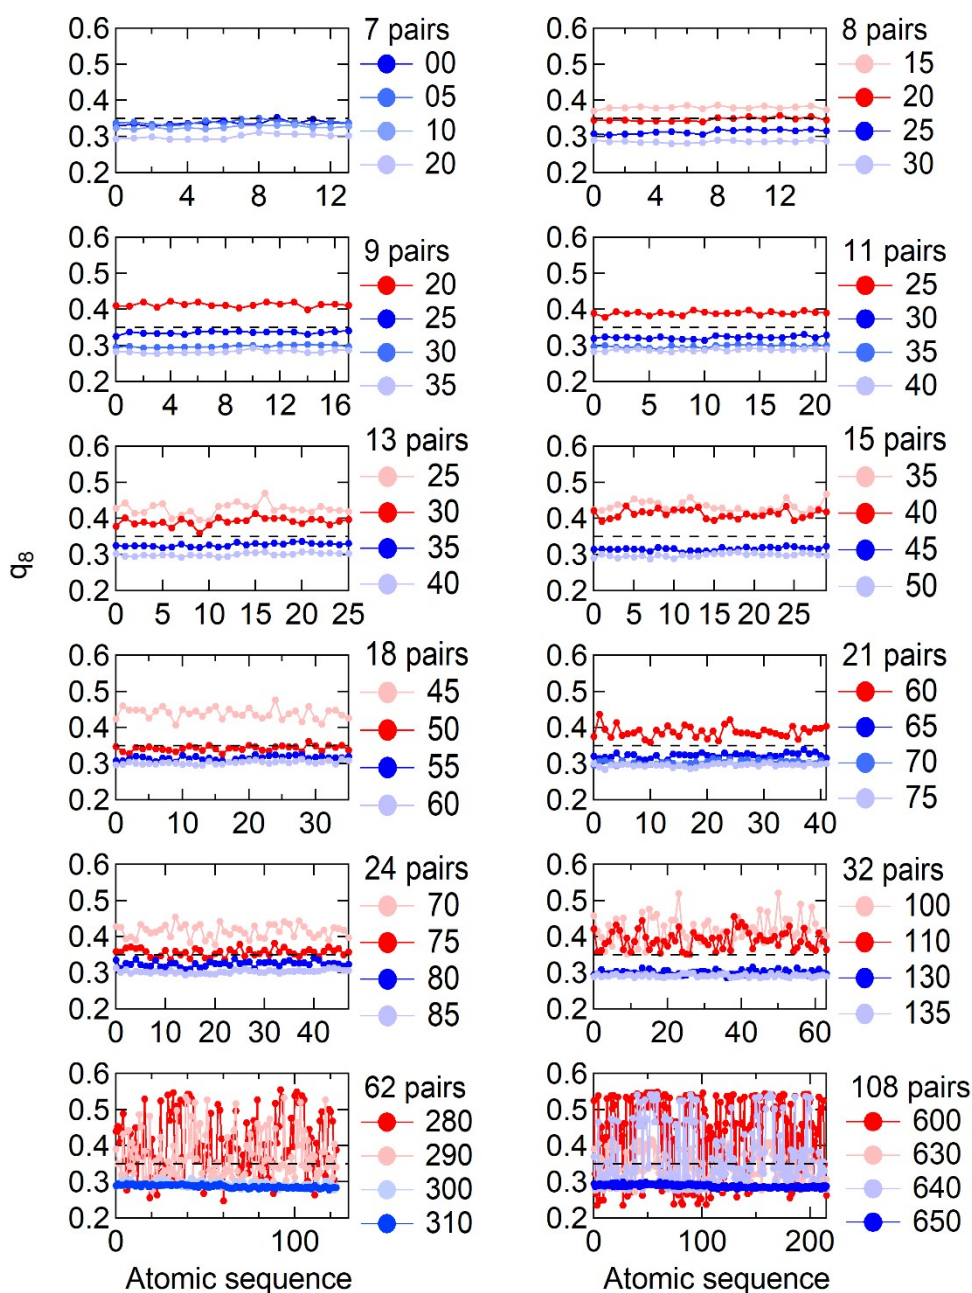

33

34 **Figure S5.  $q_8$  atomic distributions for ions in NaCl aqueous nanoparticles with different sizes**  
 35 **in solid and liquid phase.** This figure indicates that  $q_8 = 0.35$  (dash lines) is a good choice for the  
 36 threshold to distinguish solid-like and liquid-like structures of NaCl nanoparticles.

37

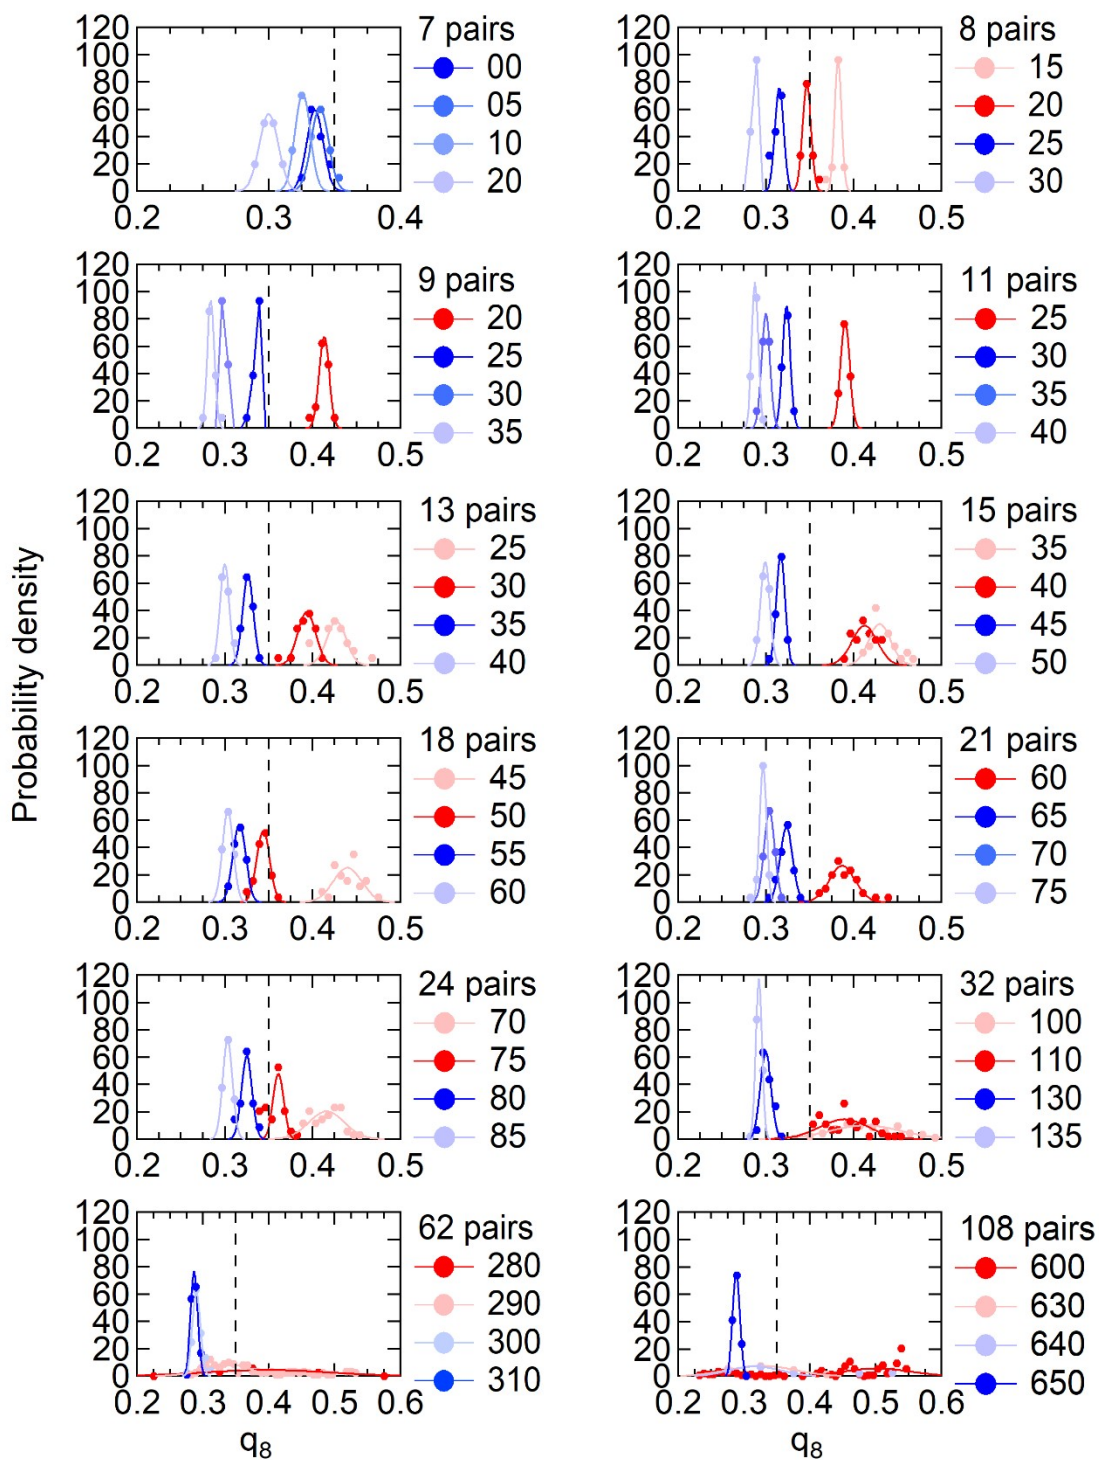



39 **Figure S6.  $q_8$  probability density distributions for ions in NaCl aqueous nanoparticles with**  
 40 **different sizes in solid and liquid phase.** This figure indicates that  $q_8 = 0.35$  (dash lines) is a good  
 41 choice for the threshold to distinguish solid-like and liquid-like structures of NaCl nanoparticles.  
 42

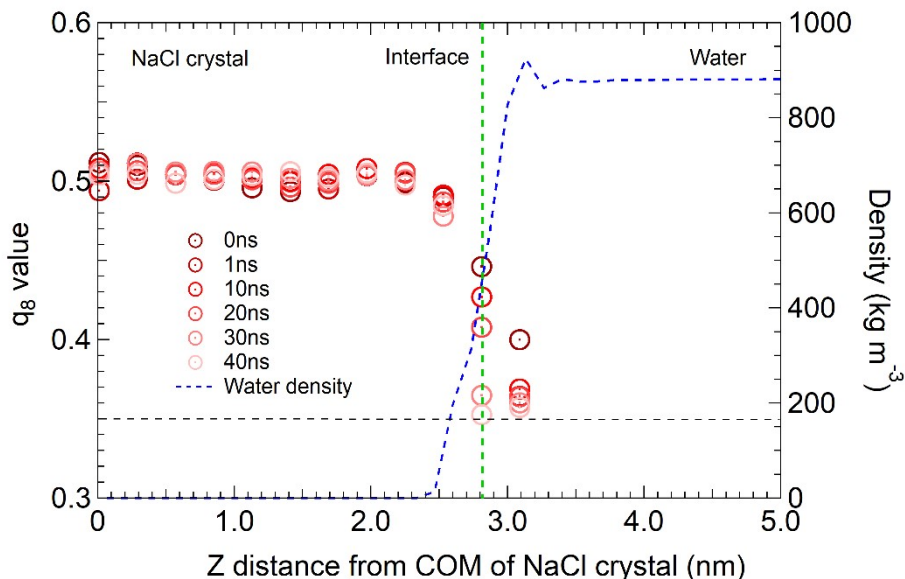

43  
 44 **Figure S7. Variation of  $q_8$  distributions with simulation time for different layers of NaCl**  
 45 **planar slab interface with water.** This figure indicates that  $q_8 = 0.35$  (grey horizontal dash line)  
 46 is a good choice for the threshold to distinguish solid-like and liquid-like structures in different  
 47 layers of NaCl planar slab. The dissolution starts from the interface with water where  $q_8$  is  
 48 decreasing to be less than 0.35 (around 3 nm in Z distance from COM of NaCl crystal).  $q_8$  is larger  
 49 than 0.35 within the undissolved layers of the NaCl planar slab. The interface (green dash line) is  
 50 determined based on half of the water density profile.

51  
 52  
 53  
 54

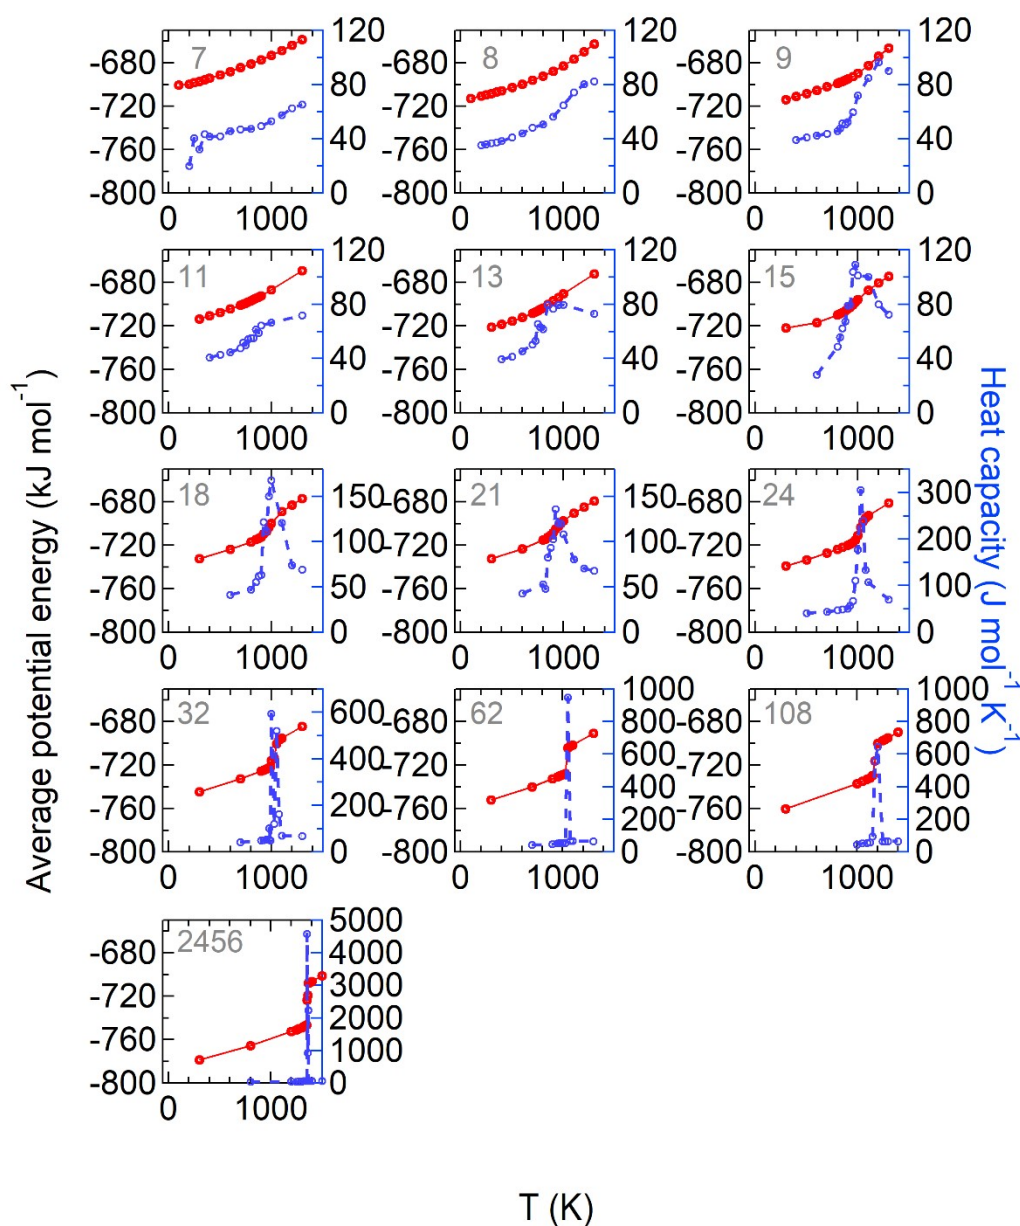

55

56

57 **Figure S8. The average potential energy (left axis) and heat capacity (right axis) as a function**  
 58 **of temperature T for NaCl crystals with different sizes.** The heat capacity (blue circles and dash  
 59 lines) is evaluated according to Eq. S1 with the average potential energy data (red circles). The  
 60 melting point is the temperature with the maximum apparent heat capacity. No clear maximum  
 61 heat capacity is found for 7, 8, 9, 11, 13 pairs of NaCl nanoparticles.

62



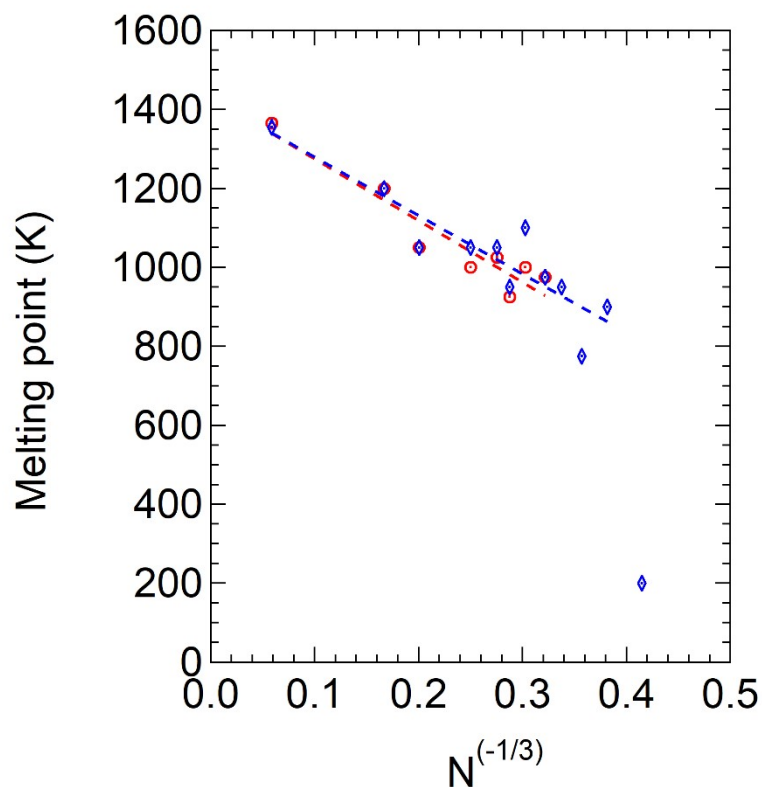

64

65 **Figure S9. Melting points for NaCl crystals as a function of  $N^{(-1/3)}$ .** The labels above the data  
 66 are the numbers of the pairs of NaCl ions.  $N$  is the number of ions. The red circles are the  
 67 melting points of NaCl nanocrystals at the maximum heat capacity derived from Eq. S1. The  
 68 blue diamonds are the melting points of NaCl nanocrystals when  $q_8$  of NaCl nanocrystals is less  
 69 than 0.35. The red dashed line shows the linear fitting of the melting point respect to  $N^{(-1/3)}$  based  
 70 on the red circles. The blue dashed line shows the linear fitting of the melting point respect to  
 71  $N^{(-1/3)}$  based on the blue diamonds except for the diamond at 7 pairs of NaCl.

72

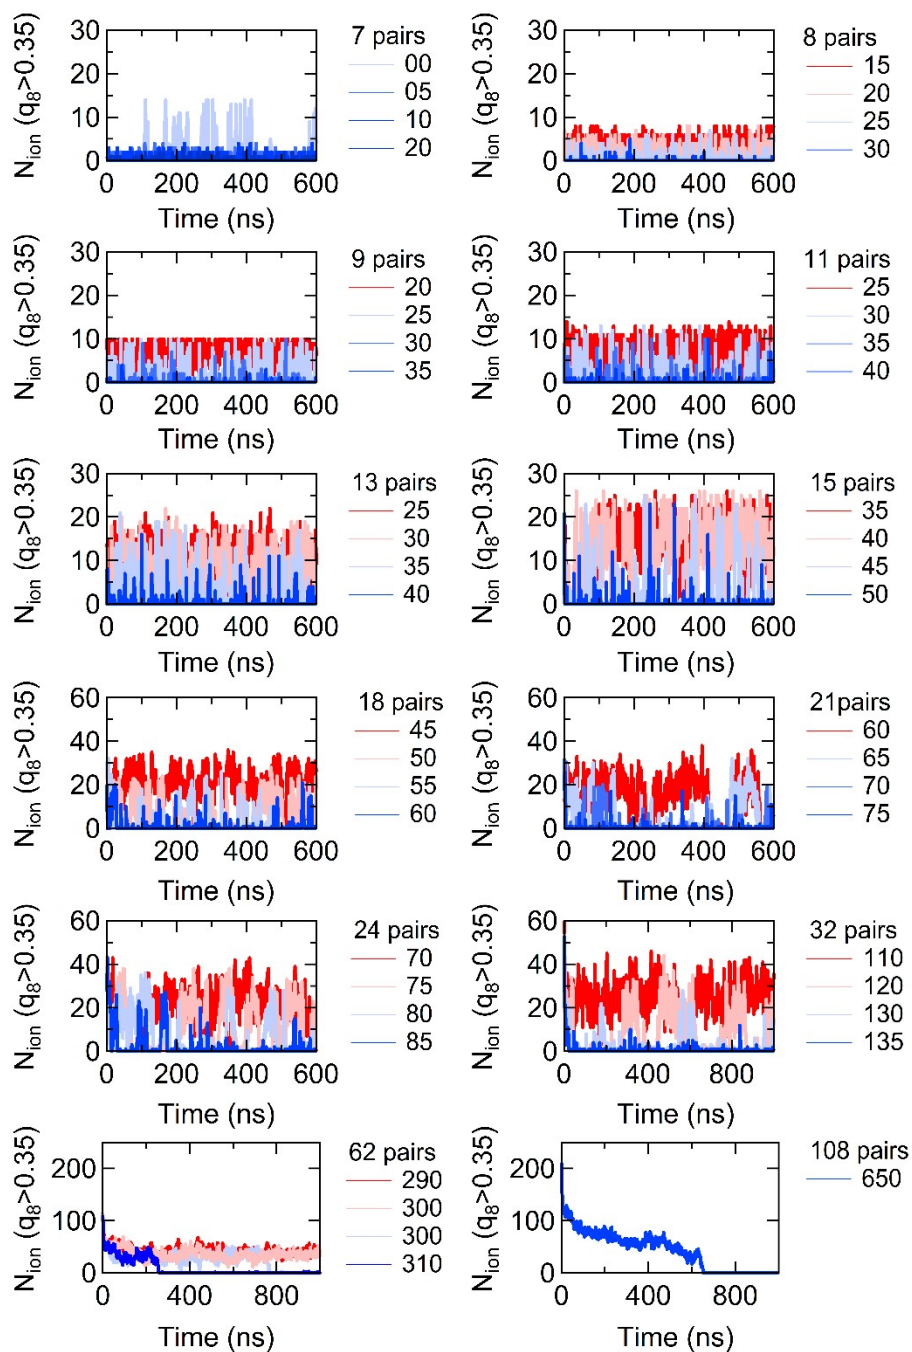

73

74 **Figure S10. The time required for the dissolution of NaCl nanoparticles of different sizes.**

75 The red line represents the state when the whole particle is completely dissolved by the excess  
 76 water molecules. The pink line represents the state when the particle is dissolved by the upper  
 77 limit of the critical number of water molecules. The light blue line represents the state when the  
 78 particle is not dissolved by the lower limit of the critical number of water molecules. The blue  
 79 line represents the state when the particle is not dissolved by enough water molecules.

| Pair number of NaCl nanoparticle | Initial snapshots | Snapshots at 300 K | Snapshots at melting points determined by heat capacity | Snapshots at melting points determined by $q_s$ | Snapshots at solubility ranges determined by $q_s$ |               |
|----------------------------------|-------------------|--------------------|---------------------------------------------------------|-------------------------------------------------|----------------------------------------------------|---------------|
| 7                                |                   |                    |                                                         | 200 K<br>                                       | 0 water<br>                                        |               |
| 9                                |                   |                    |                                                         | 900 K<br>                                       | 20 water<br>                                       | 25 water<br>  |
| 11                               |                   |                    |                                                         | 775 K<br>                                       | 25 water<br>                                       | 30 water<br>  |
| 13                               |                   |                    |                                                         | 950 K<br>                                       | 30 water<br>                                       | 35 water<br>  |
| 15                               |                   |                    | 975 K<br>                                               | 975 K<br>                                       | 40 water<br>                                       | 45 water<br>  |
| 18                               |                   |                    | 1000 K<br>                                              | 1100 K<br>                                      | 50 water<br>                                       | 55 water<br>  |
| 21                               |                   |                    | 925 K<br>                                               | 950 K<br>                                       | 60 water<br>                                       | 65 water<br>  |
| 24                               |                   |                    | 1025 K<br>                                              | 1050 K<br>                                      | 75 water<br>                                       | 80 water<br>  |
| 32                               |                   |                    | 1000 K<br>                                              | 1050 K<br>                                      | 110 water<br>                                      | 130 water<br> |
| 62                               |                   |                    | 1050 K<br>                                              | 1050 K<br>                                      | 280 water<br>                                      | 310 water<br> |
| 108                              |                   |                    | 1200 K<br>                                              | 1200 K<br>                                      | 600 water<br>                                      | 650 water<br> |
| bulk                             |                   |                    | 1365 K<br>                                              | 1355 K<br>                                      |                                                    |               |

81

82 **Figure S11. Snapshots of NaCl nanoparticles during the melting and dissolution processes.**

83

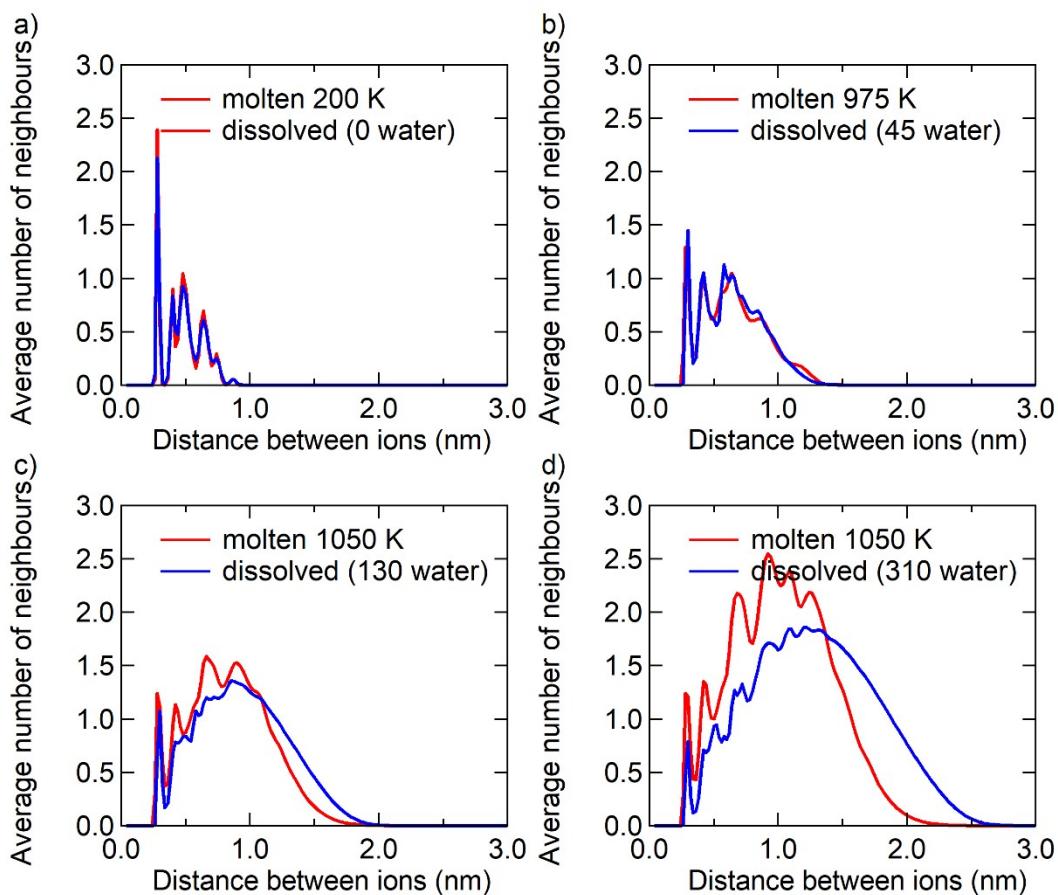

84

85 **Figure S12.  $RDF_{ions-ions}$  of the molten NaCl and dissolved NaCl in saturated solution**

86 **nanodroplets.** (a) For 7 pairs of NaCl ions particles (diameter = 0.507 nm). (b) For 15 pairs of

87 NaCl ions particles (diameter = 0.709 nm). (c) For 32 pairs of NaCl ions particles (diameter =

88 1.042 nm). (d) For 62 pairs of NaCl ions particles (diameter = 1.358 nm).

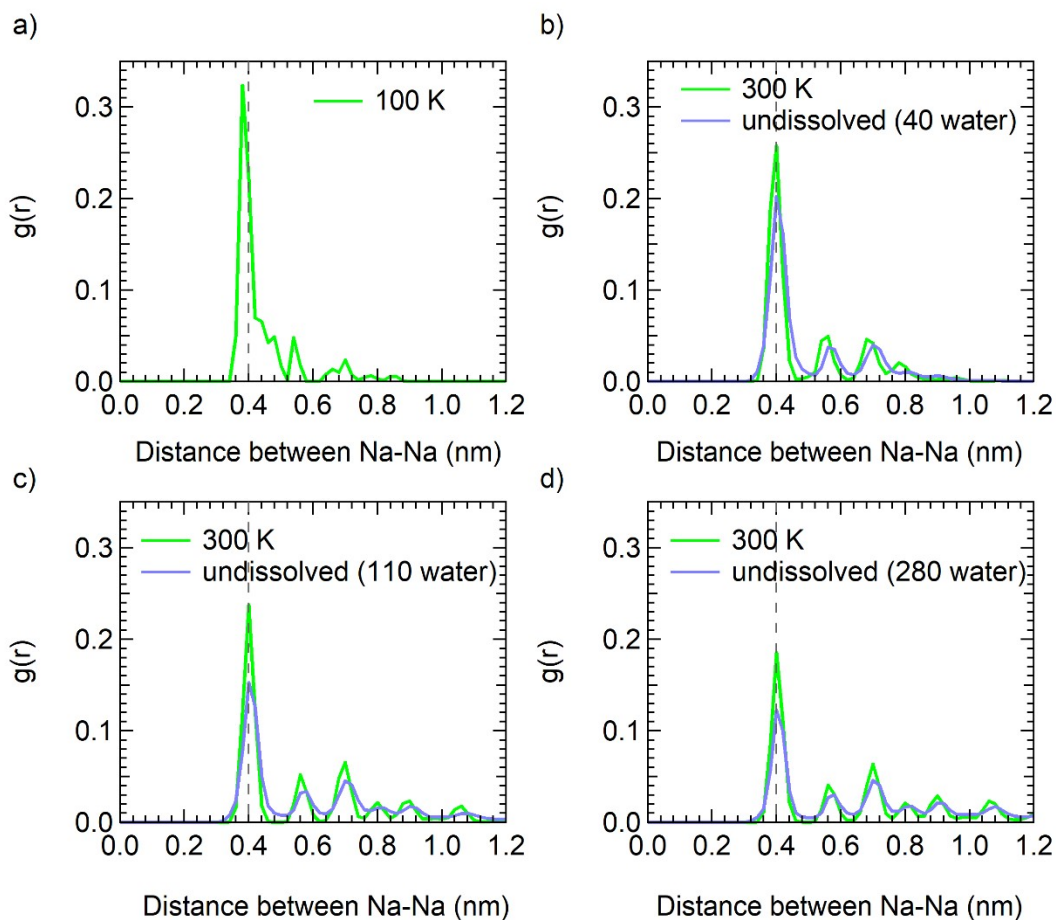

89 Distance between Na-Na (nm) Distance between Na-Na (nm)  
 90 **Figure S13.  $RDF_{Na-Na}$  of the unmelted NaCl nanocrystal and undissolved NaCl in**  
 91 **nanodroplets.** (a) For 7 pairs of NaCl ions particles (diameter = 0.507 nm). (b) For 15 pairs of  
 92 NaCl ions particles (diameter = 0.709 nm). (c) For 32 pairs of NaCl ions particles (diameter =  
 93 1.042 nm). (d) For 62 pairs of NaCl ions particles (diameter = 1.358 nm). The dash line indicates  
 94 the theoretical position where peak should occur according to the ideal NaCl crystal structure with  
 95 the distance of  $\sim 0.4$  nm between  $Na^+$  and  $Na^+$  ions nearest neighbors.

96

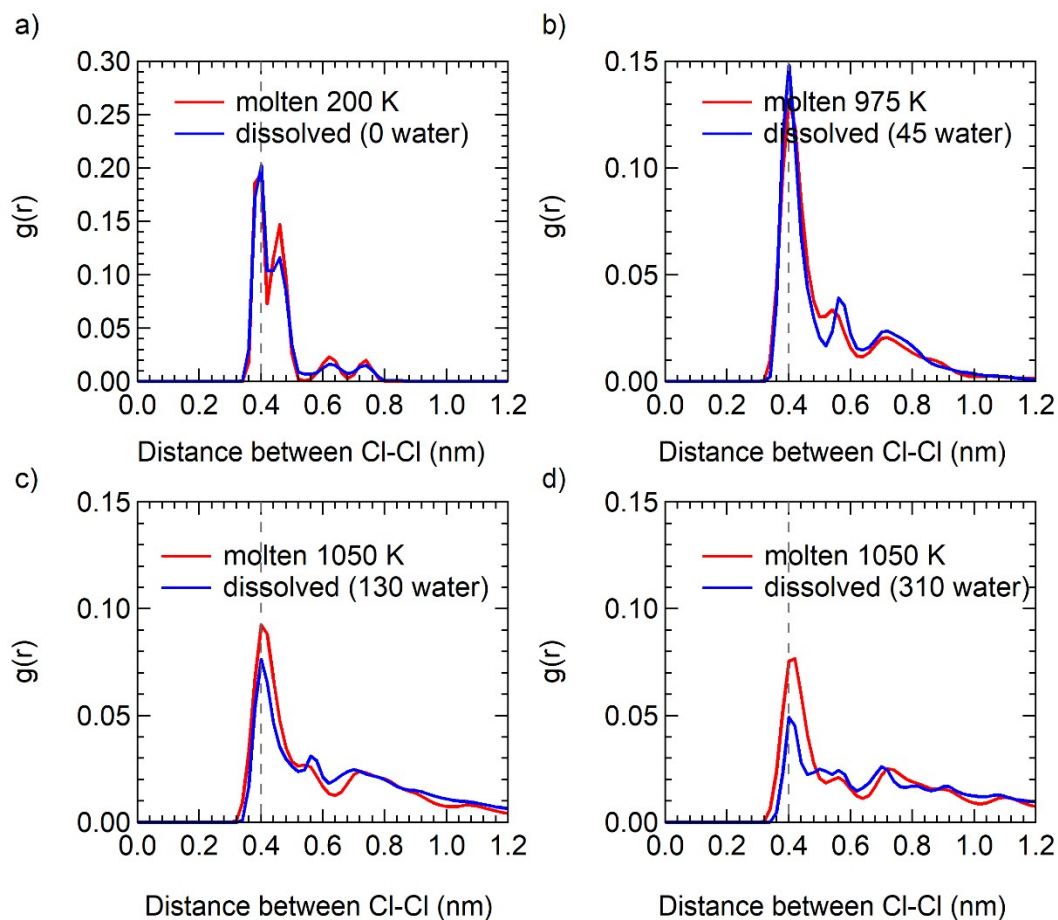

97 Distance between Cl-Cl (nm) Distance between Cl-Cl (nm)  
 98 **Figure S14.  $RDF_{Cl-Cl}$  of the molten NaCl and dissolved NaCl in saturated solution**  
 99 **nanodroplets.** (a) For 7 pairs of NaCl ions particles (diameter = 0.507 nm). (b) For 15 pairs of  
 100 NaCl ions particles (diameter = 0.709 nm). (c) For 32 pairs of NaCl ions particles (diameter =  
 101 1.042 nm). (d) For 62 pairs of NaCl ions particles (diameter = 1.358 nm). The dash line indicates  
 102 the theoretical position where peak should occur according to the ideal NaCl crystal structure with  
 103 the distance of  $\sim 0.4$  nm between  $Cl^-$  and  $Cl^-$  ions nearest neighbors.



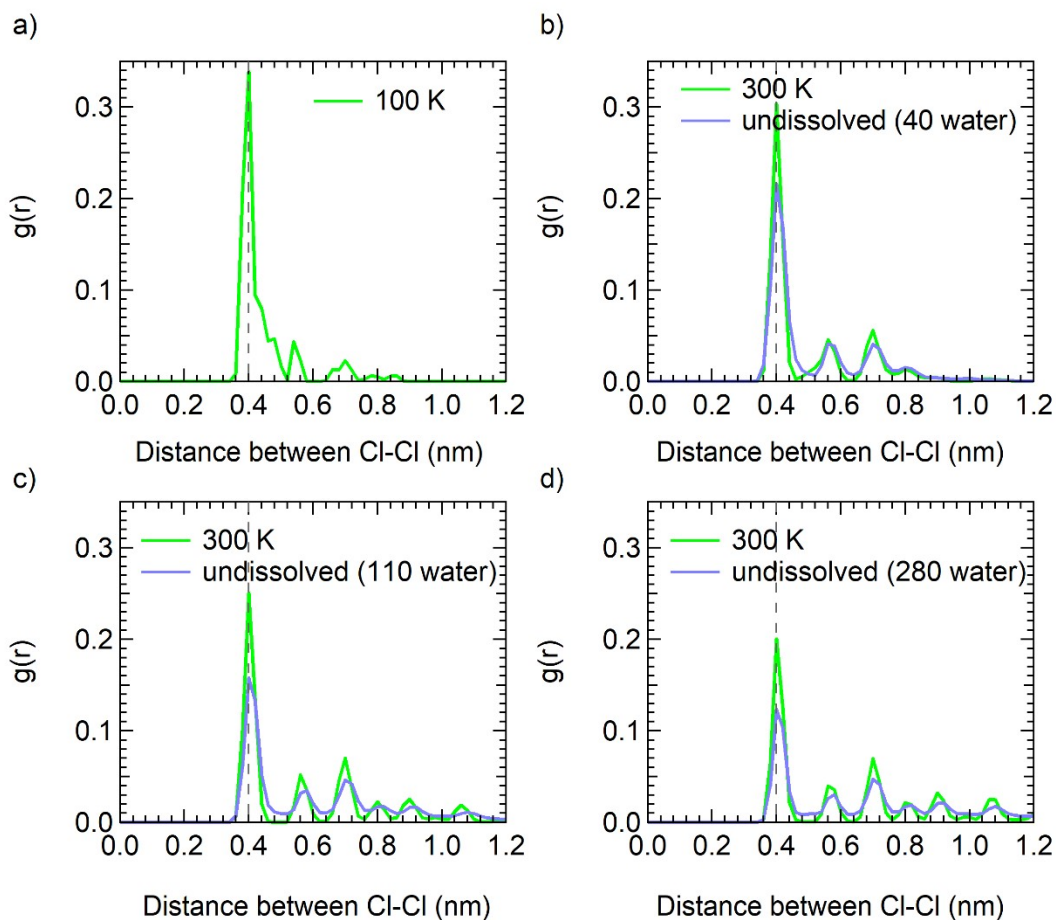

104

105 **Figure S15.  $RDF_{Cl-Cl}$  of the unmelted NaCl nanocrystal and undissolved NaCl in**  
 106 **nanodroplets.** (a) For 7 pairs of NaCl ions particles (diameter = 0.507 nm). (b) For 15 pairs of  
 107 NaCl ions particles (diameter = 0.709 nm). (c) For 32 pairs of NaCl ions particles (diameter =  
 108 1.042 nm). (d) For 62 pairs of NaCl ions particles (diameter = 1.358 nm). The dash line indicates  
 109 the theoretical position where peak should occur according to the ideal NaCl crystal structure with  
 110 the distance of  $\sim 0.4$  nm between  $Cl^-$  and  $Cl^-$  ions nearest neighbors.

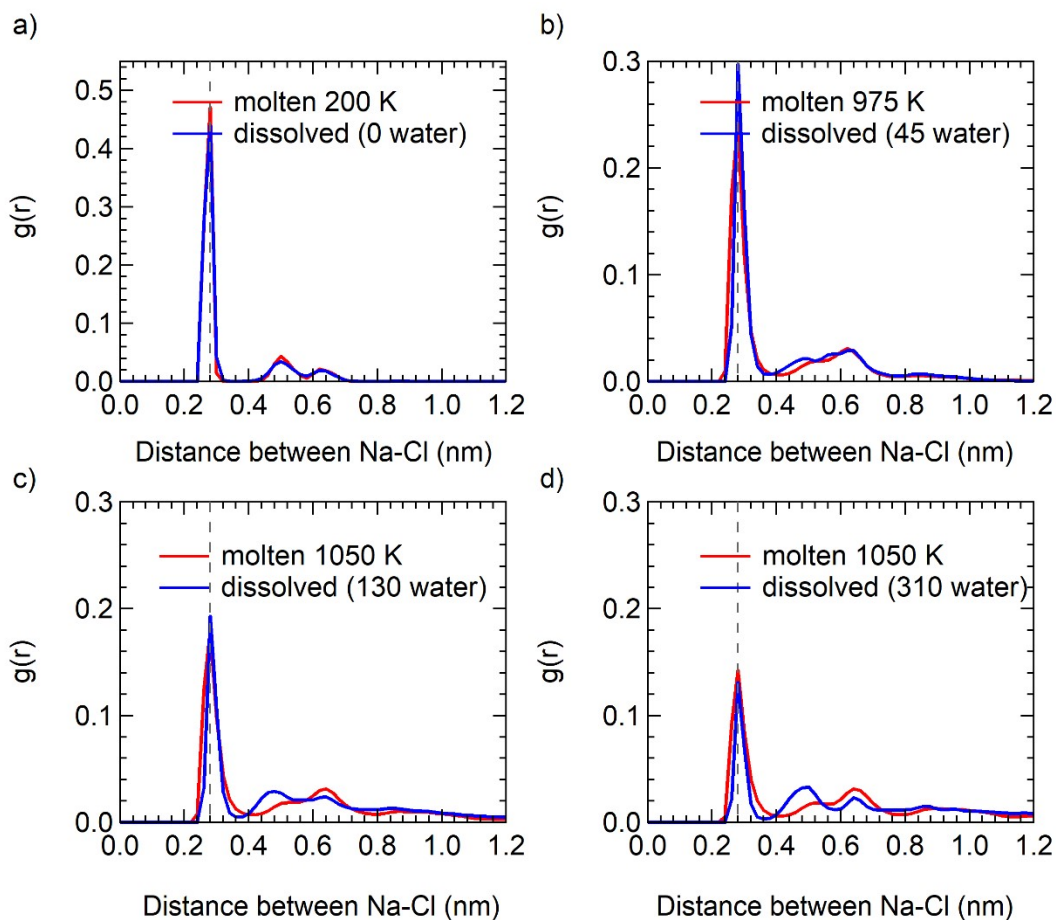

111 Distance between Na-Cl (nm) Distance between Na-Cl (nm)  
 112 **Figure S16.  $RDF_{Na-Cl}$  of the molten NaCl and dissolved NaCl in saturated solution**  
 113 **nanodroplets.** (a) For 7 pairs of NaCl ions particles (diameter = 0.507 nm). (b) For 15 pairs of  
 114 NaCl ions particles (diameter = 0.709 nm). (c) For 32 pairs of NaCl ions particles (diameter =  
 115 1.042 nm). (d) For 62 pairs of NaCl ions particles (diameter = 1.358 nm). The dash line indicates  
 116 the theoretical position where peak should occur according to the ideal NaCl crystal structure with  
 117 the distance of  $\sim 0.28$  nm between  $Na^+$  and  $Cl^-$  ions nearest neighbors.

118

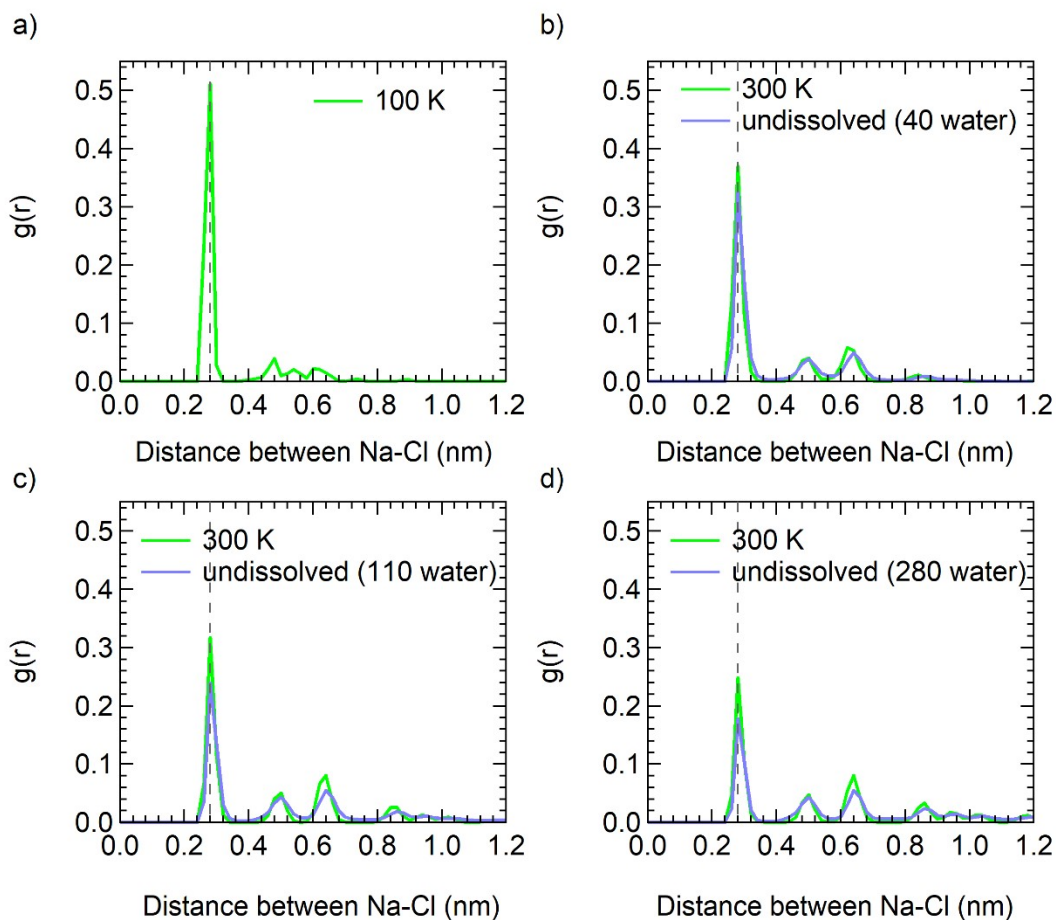

119

120 **Figure S17.  $RDF_{Na-Cl}$  of the unmelted NaCl nanocrystal and undissolved NaCl in**  
 121 **nanodroplets.** (a) For 7 pairs of NaCl ions particles (diameter = 0.507 nm). (b) For 15 pairs of  
 122 NaCl ions particles (diameter = 0.709 nm). (c) For 32 pairs of NaCl ions particles (diameter =  
 123 1.042 nm). (d) For 62 pairs of NaCl ions particles (diameter = 1.358 nm). The dash line indicates  
 124 the theoretical position where peak should occur according to the ideal NaCl crystal structure with  
 125 the distance of  $\sim 0.28$  nm between  $Na^+$  and  $Cl^-$  ions nearest neighbors.

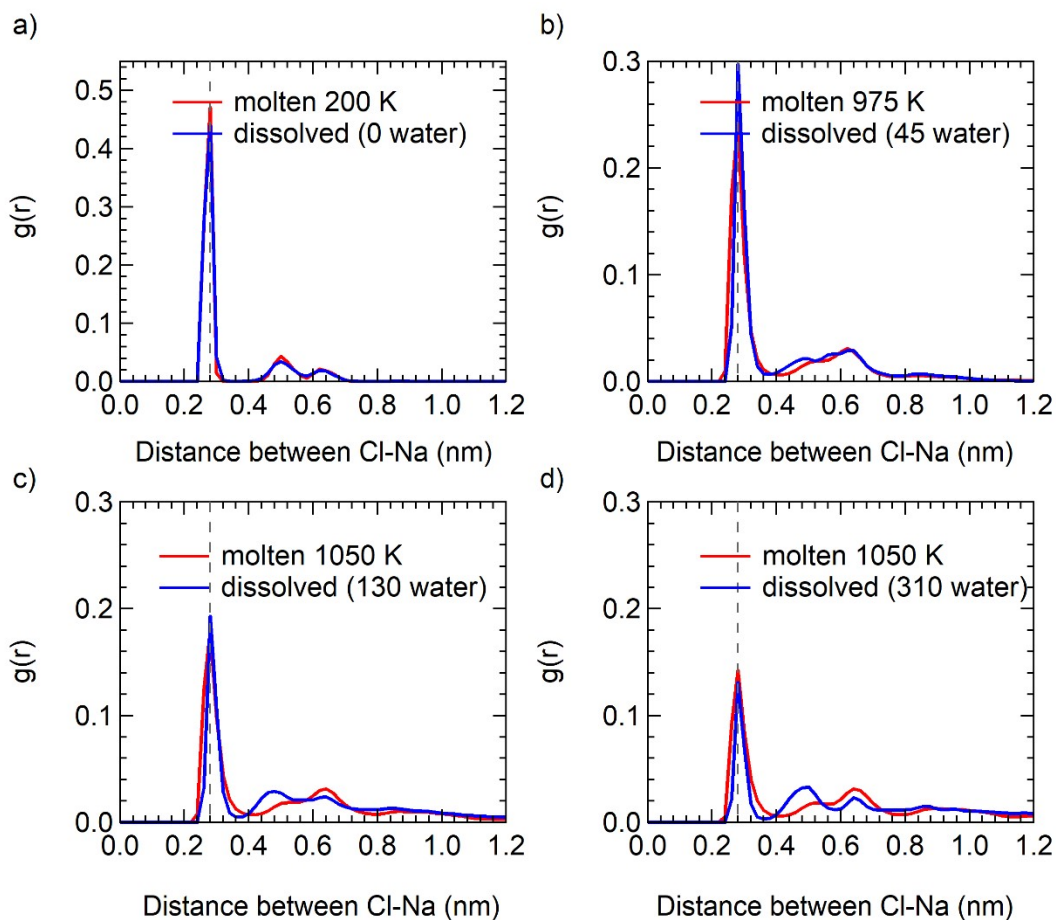

126

127 **Figure S18.  $RDF_{Cl-Na}$  of the molten NaCl and dissolved NaCl in saturated solution**  
 128 **nanodroplets.** (a) For 7 pairs of NaCl ions particles (diameter = 0.507 nm). (b) For 15 pairs of  
 129 NaCl ions particles (diameter = 0.709 nm). (c) For 32 pairs of NaCl ions particles (diameter =  
 130 1.042 nm). (d) For 62 pairs of NaCl ions particles (diameter = 1.358 nm). The dash line indicates  
 131 the theoretical position where peak should occur according to the ideal NaCl crystal structure with  
 132 the distance of  $\sim 0.28$  nm between  $Cl^-$  and  $Na^+$  ions nearest neighbors.

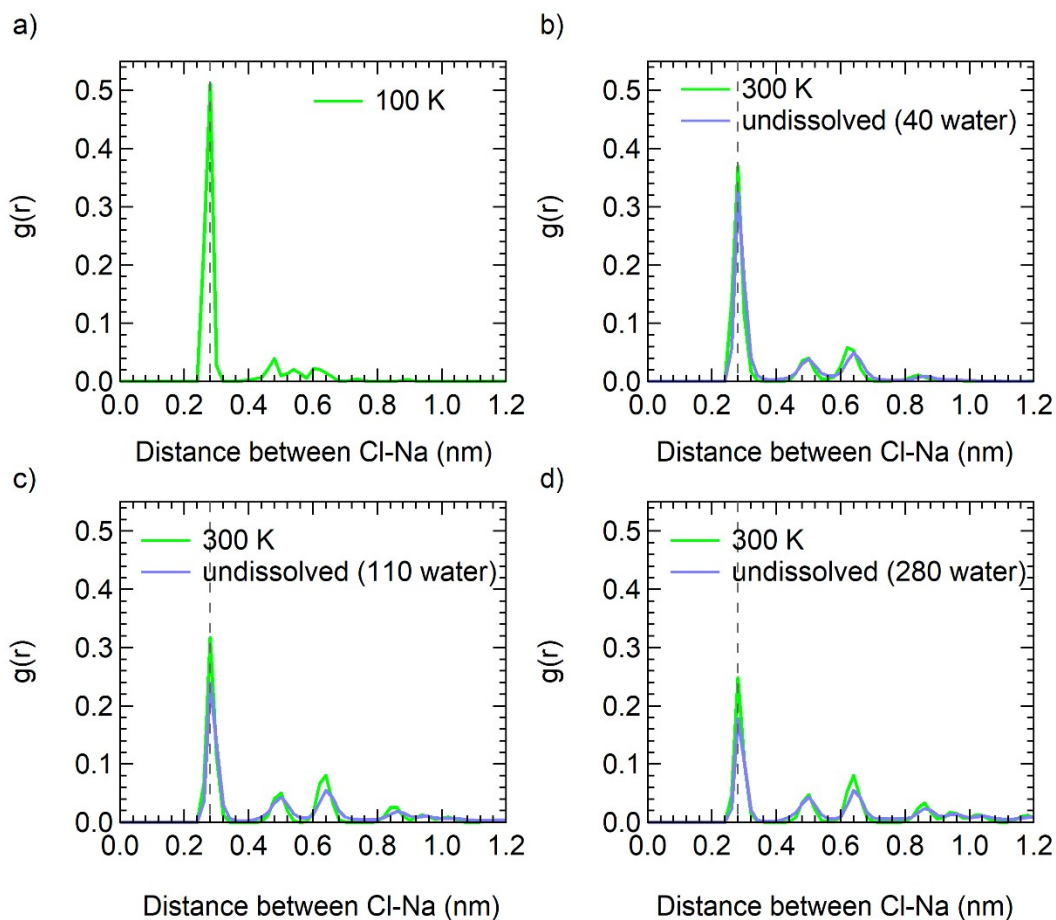

133  
134

135 **Figure S19.  $RDF_{Cl-Na}$  of the unmelted NaCl nanocrystal and undissolved NaCl in**  
 136 **nanodroplets.** (a) For 7 pairs of NaCl ions particles (diameter = 0.507 nm). (b) For 15 pairs of  
 137 NaCl ions particles (diameter = 0.709 nm). (c) For 32 pairs of NaCl ions particles (diameter =  
 138 1.042 nm). (d) For 62 pairs of NaCl ions particles (diameter = 1.358 nm). The dash line indicates  
 139 the theoretical position where peak should occur according to the ideal NaCl crystal structure with  
 140 the distance of  $\sim 0.28$  nm between  $Cl^-$  and  $Na^+$  ions nearest neighbors.

141

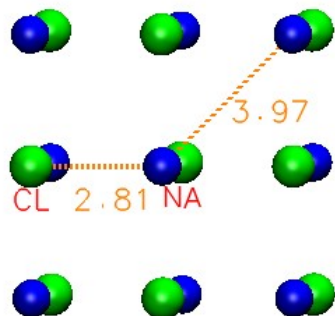

142

143 **Figure S20. The snapshot of initial 9 pairs of NaCl nanocrystal.** The nearest neighbor distance  
144 of  $\text{Na}^+$  and  $\text{Cl}^-$  is  $\sim 0.281$  nm, and the nearest neighbor distance of  $\text{Na}^+$  and  $\text{Na}^+$  ( $\text{Cl}^-$  and  $\text{Cl}^-$ ) is  
145  $\sim 0.397$  nm.



## Supplementary Tables

**Table S1. Summary of the number of ion pairs, equivalent volume diameter, lower limit of the critical number of H<sub>2</sub>O that dissolve entire particle, upper limit of the critical number of H<sub>2</sub>O that dissolve entire particle, saturated mass fraction range, average potential energy of NaCl in dissolved state, at 300 K, and in melting point, and melting point. <sup>a</sup>Bulk saturated mass fraction is determined from MD simulations in <sup>9</sup>. The potential energy of molten NaCl is near -698.39 kJ/mol for all size.**

| Pair number of NaCl ions in the particle | Diameter (nm) | Lower limit of the critical number of H <sub>2</sub> O that dissolve entire particle | Upper limit of the critical number of H <sub>2</sub> O that dissolve entire particle | Saturated mass fraction max (x <sub>s</sub> <sup>*</sup> max) | Saturated mass fraction min (x <sub>s</sub> <sup>*</sup> min) | Simulation time for solubility (ns) | Average potential Energy of NaCl in dissolution (kJ mol <sup>-1</sup> ) | error  | Average potential Energy of NaCl crystal at 300 K (kJ mol <sup>-1</sup> ) | error | Average potential Energy of NaCl in melting point (kJ mol <sup>-1</sup> ) | error | Melting Point (K) determined by the heat capacity | Melting Point (K) determined by the q <sub>8</sub> method |
|------------------------------------------|---------------|--------------------------------------------------------------------------------------|--------------------------------------------------------------------------------------|---------------------------------------------------------------|---------------------------------------------------------------|-------------------------------------|-------------------------------------------------------------------------|--------|---------------------------------------------------------------------------|-------|---------------------------------------------------------------------------|-------|---------------------------------------------------|-----------------------------------------------------------|
| 7                                        | 0.507         | -                                                                                    | -                                                                                    | 1.000                                                         | 1.000                                                         | 600                                 | -697.223                                                                | 0.000  | -697.237                                                                  | 0.420 |                                                                           |       |                                                   | 200                                                       |
| 8                                        | 0.530         | 20                                                                                   | 25                                                                                   | 0.565                                                         | 0.510                                                         | 600                                 | -663.653                                                                | 11.663 | -708.286                                                                  | 0.018 |                                                                           |       |                                                   |                                                           |
| 9                                        | 0.551         | 20                                                                                   | 25                                                                                   | 0.594                                                         | 0.539                                                         | 600                                 | -683.027                                                                | 14.850 | -713.802                                                                  | 0.023 |                                                                           |       |                                                   | 900                                                       |

|     |       |     |     |       |       |      |          |            |                  |           |                  |     |      |      |     |
|-----|-------|-----|-----|-------|-------|------|----------|------------|------------------|-----------|------------------|-----|------|------|-----|
| 11  | 0.594 | 25  | 30  | 0.588 | 0.543 | 600  | -676.178 | 11.88<br>2 | -<br>713.43<br>0 | 0.03<br>1 |                  |     |      |      | 775 |
| 13  | 0.665 | 30  | 35  | 0.585 | 0.547 | 600  | -676.890 | 12.27<br>0 | -<br>721.00<br>5 | 0.03<br>0 |                  |     |      |      | 950 |
| 15  | 0.709 | 40  | 45  | 0.549 | 0.520 | 600  | -668.226 | 12.68<br>0 | -<br>721.74<br>0 | 0.05<br>4 | -<br>698.00<br>7 | 1.7 | 975  | 975  |     |
| 18  | 0.795 | 50  | 55  | 0.539 | 0.515 | 600  | -657.628 | 12.22<br>8 | -<br>732.45<br>0 | 0.05<br>0 | -<br>699.75<br>0 | 5.5 | 1000 | 1100 |     |
| 21  | 0.837 | 60  | 65  | 0.532 | 0.512 | 600  | -657.900 | 5.762      | -<br>732.25<br>7 | 0.02<br>6 | -<br>705.11<br>0 | 3.3 | 925  | 950  |     |
| 24  | 0.910 | 75  | 80  | 0.510 | 0.493 | 600  | -644.977 | 12.63<br>5 | -<br>739.00<br>4 | 0.03<br>2 | -<br>703.52<br>9 | 1.2 | 1025 | 1050 |     |
| 32  | 1.042 | 110 | 130 | 0.486 | 0.444 | 1000 | -624.098 | 35.15<br>2 | -<br>744.72<br>2 | 0.02<br>8 | -<br>716.00<br>9 | 5.6 | 1000 | 1050 |     |
| 62  | 1.358 | 280 | 310 | 0.418 | 0.394 | 1000 | -566.344 | 37.29<br>0 | -<br>752.28<br>5 | 0.06<br>8 | -<br>704.30<br>5 | 1.3 | 1050 | 1050 |     |
| 108 | 1.745 | 600 | 650 | 0.369 | 0.350 | 1000 | -521.377 | 41.78<br>7 | -<br>760.18<br>4 | 0.04<br>5 | -<br>700.25<br>2 | 1.9 | 1200 | 1200 |     |

|      |                                    |       |       |                    |                    |   |          |            |                  |      |                  |     |      |      |
|------|------------------------------------|-------|-------|--------------------|--------------------|---|----------|------------|------------------|------|------------------|-----|------|------|
| 2456 | cubic<br>(4.5<br>nm <sup>3</sup> ) | 37000 | 37000 | 0.178 <sup>a</sup> | 0.178 <sup>a</sup> | - | -358.350 | 20.95<br>0 | -<br>778.70<br>9 | 0.32 | -<br>708.07<br>0 | 3.7 | 1365 | 1355 |
|------|------------------------------------|-------|-------|--------------------|--------------------|---|----------|------------|------------------|------|------------------|-----|------|------|

### Supplementary Note 1: simulation of the melting process

The NaCl nanoparticles with different diameters were simulated at different temperatures with a  $\Delta T$  (= 50 to 100 K). Following the approach of Qi et al.<sup>19</sup>, the melting point is the temperature with the maximum apparent heat capacity. The heat capacity was evaluated according to the following equation:

$$C_p(T) = \frac{\partial U}{\partial T} + \frac{3}{2}R_{gas} \quad (S1)$$

where  $U$  is the average potential energy and  $R_{gas}$  the universal gas constant. The melting process simulation for NaCl nanocrystals with different diameters in this study is summarized in Supplementary Table S1. By fitting the potential energy to a linear function of  $T$  in the solid and liquid phase (above and below the transition temperature), the melting point of NaCl crystal can be obtained (Fig. S8). The simulation demonstrates that the melting point of the NaCl nanocrystal is size-dependent, and this phenomenon also occurs in other substances. The nanocrystal with 7 pairs of NaCl ions is in liquid-like (molten) state at 300 K in the simulation.

### Supplementary Note 2: $a_w$ determination

Water activity ( $a_w$ ) of NaCl is determined by the modified TM model<sup>3, 38</sup>. It is expressed as a segmentation function of the solute mass fraction ( $x_s$ ):

$$a_w = \begin{cases} 1 + \sum C_l (100 \cdot x_s)^l & (x_s \leq 0.45) \\ \frac{a_1 \cdot x_s^2 + a_2 \cdot x_s + a_3}{x_s^2 + a_4 \cdot x_s + a_5} & (x_s > 0.45) \end{cases} \quad (S2)$$

where the respective coefficients for NaCl ( $x_s \leq 0.45$ ) are  $C_1 = -6.366 \times 10^{-3}$ ,  $C_2 = 8.624 \times 10^{-5}$ ,  $C_3 = -1.158 \times 10^{-5}$ , and  $C_4 = 1.518 \times 10^{-7}$ , and the respective coefficients for NaCl ( $x_s > 0.45$ ) are  $a_1 = 0.1703$ ,  $a_2 = -0.6018$ ,  $a_3 = 0.4315$ ,  $a_4 = -0.4594$ ,  $a_5 = 0.4343$ .

### Supplementary Note 3: Estimation of size-dependent solid-liquid surface tension

The solid-liquid surface tension of the NaCl nanoparticle ( $\sigma^{sl}$ ) is determined by the MD solubility data based on the combination of the Ostwald-Freundlich<sup>6, 7</sup> and Gibbs-Duhem equations<sup>34-36</sup> as

$$\sigma_{sl} = \frac{RTD}{4\nu} \ln \left( \frac{a_s^*}{a_{s,bulk}^*} \right) = - \frac{RTD}{4\nu} \int_{x_{s,bulk}^*}^{x_s^*} M \frac{1-x_s}{x_s} d \ln a_w \# \quad (S3)$$

where  $R$  is the universal gas constant,  $T$  is the temperature,  $D$  is the volume equivalent diameter of NaCl crystal at the saturation dissolution point, which equals to the diameter of the equilibrium droplet of equivalent volume,  $\nu$  is the molar volume of NaCl solid phase (atomic volume) given as  $2.7 \times 10^{-5} \text{ m}^3 \text{ mol}^{-1}$ , and  $M$  is the molar weight of solute.  $x_{s,bulk}^*$  is the mass fraction of solute in a saturated bulk solution, and  $a_{s,bulk}^*$  is the solute activity at  $x_{s,bulk}^*$ .  $x_s^*$  is the mass fraction of solute in a saturated droplet, and  $a_s^*$  is the solute activity at  $x_s^*$ .  $a_w$  is the water activity retrieved from modified TM model (Supplementary Note 2).

The calculated solid-liquid surface tension of NaCl is fitted by the first-order Tolman equation and second-order Tolman equation, respectively<sup>39</sup>:

$$\sigma_{sl} = \frac{\sigma_{sl,bulk}}{\left(1 + \frac{4\delta}{D}\right)} \# \quad (S4)$$

$$\sigma_{sl} = \frac{\sigma_{sl,bulk}}{\left(1 + \frac{4\delta}{D} + 8\left(\frac{l}{D}\right)^2\right)} \# \quad (S5)$$

where  $\sigma_{sl,bulk}$  is the bulk solid-liquid surface tension,  $D$  is the volume equivalent diameter of NaCl crystal at the saturation dissolution point, which equals to the diameter of the equilibrium droplet of equivalent volume.  $\delta$  is the Tolman length, and  $l$  is a parameter that has the dimension of length.

The calculated  $\sigma_{sl}$  shows a significant size dependence with particle diameter larger than 0.530 nm (8 pairs of NaCl ions) (red and orange bars in Fig. S1).  $\sigma_{sl}$  decreases as the size of NaCl nanocrystals decreases. This size dependence is well explained by the second-order Tolman equation (Eq. S5), corresponding to the derived bulk solid-liquid surface tension ( $\sigma_{sl,bulk} = [113.16, 142.95] \text{ mN m}^{-1}$ ) and a negative Tolman length ( $\delta = [-0.082, -0.018] \text{ nm}$ ) (blue shaded curves in Fig. S1), while the first-order Tolman equation fit with fixed  $\sigma_{sl,bulk} = 102 \text{ mN m}^{-1}$  calculated by MD<sup>17</sup> (light pink shaded curves in Fig. S1) performs poorly.

According to the blue shaded curves in Fig. S1,  $\sigma_{sl}$  has a critical decrease when the particle diameter is less than  $\sim 2$  nm. This indicates that the bulk solid-liquid surface tension is applicable, but this may not be the case for the particles less than  $\sim 2$  nm. Besides, it is still on debate if there is agreement between the interfacial energy at the solid-liquid interface  $\sigma_{sl}$  and at the solute embryo  $\gamma_{sl}$ <sup>3,40</sup>. We estimate  $\sigma'_{sl,7} = (63.88, 70.57]$  mN m<sup>-1</sup> based on the second-order Tolman equation, which is close to the interfacial energy of solute embryo  $\gamma_{sl}$  range from 41 to 63 mN m<sup>-1</sup><sup>41</sup>. This indicates that  $\sigma_{sl}$  and  $\gamma_{sl}$  may be uniform when the particle is small enough. Note that, since the particle with 7 pairs of NaCl ions is in the molten state at 300 K, the directly calculated  $\sigma_{sl,7} = 100.82$  mN m<sup>-1</sup>, which is close to the solid-vapor surface tension  $\sigma'_{sl,7} = 101.85$  mN m<sup>-1</sup><sup>42</sup>, may not represent the interfacial energy at the solid-liquid interface.

#### Supplementary Note 4: $q_8$ validation

We confirm that  $q_8$  is a good indicator for determining whether sodium chloride is solid or liquid. Firstly, we demonstrate that  $q_8$  provides the best separation between liquid and solid phase distributions compared to  $q_4$  and  $q_6$ . Based on Eq. 1 and Eq. 2, we choose  $l = 4, 6,$  and  $8$  and calculate  $q_l(i)$  for each ion in the NaCl solid and liquid particle with 108 pairs of ions, respectively. As shown in Fig. S3 and S4,  $q_8$  atomic and probability distributions of ions can well distinguish NaCl solid and liquid phase. When  $q_8 < \sim 0.35$ , ions are supposed to be liquid. Lanaro and Patey's study<sup>32</sup> yielded a similar result. They chose  $l = 2, 4, 6, 8$  and  $10$  and investigated  $q_l(i)$  for the NaCl spherical crystal with  $\sim 2000$  ions as the solid phase and a supersaturated solution with NaCl mole fraction equal  $0.20$  as the liquid phase at  $300$  K. And  $q_8$  was proved to be the best choice for NaCl solid and liquid phase separation, which is similar to the results in this study. Secondly, it is demonstrated that  $q_8 = 0.35$  is a good choice for the threshold to distinguish solid-like and liquid-like structures of NaCl nanoparticles. We investigated  $q_l(i)$  for the NaCl solid and liquid nanoparticles with different pairs of NaCl ions, respectively. As shown in Fig. S5 and S6,  $q_8$  atomic and probability distributions of ions is less than  $0.35$  (grey dash line) in each NaCl liquid nanoparticle. Thus,  $q_8 = 0.35$  can well separate the solid and liquid phase NaCl nanoparticles. Thirdly, we demonstrate that  $q_8 = 0.35$  is a good choice for the threshold to distinguish solid-like and liquid-like structures in different layers of a NaCl planar slab. We conduct the study of the NaCl crystal planar slab ( $4.5$  nm<sup>3</sup>,  $5.6$  nm



volume equivalent diameter) dissolved in 37000 water molecules for 100 ns in the MD simulation. The  $q_8$  distribution of dissolved ions at the interface tends to be less than 0.35, while the  $q_8$  distribution of undissolved ions inside the crystal remains larger than 0.35 (Fig. S7). This implies that  $q_8 = 0.35$  is still effective for separating solid and liquid phase ions in the dissolution process of the NaCl planar slab system. Overall,  $q_8$  can be examined as a universal standard for separating liquid and solid phase NaCl ions, not only for nanoparticles but also for planar plate systems.
